# Supplementary material
Source: PubMed Central journal article supplement (PMC7375891)
Supplement: BLT-18-261_Online_Supplementary_Content.pdf [file BLT-18-261_Online_Supplementary_Content.pdf]

**ONLINE SUPPLEMENTARY CONTENT**

**Table S1** - Predefined surgical procedures from the Diagnostic Therapeutic and Surgical Procedure Classification of the Turkish Social Insurance Institution

| Cardiovascular-Thoracic                                                                                                                                                                                                                                                                                                                                                                                                                                 | Orthopaedics                                                                                                                                                                                                                                                                                                            | Transplantation                                                                                                                                                                   | Gynaecology-Obstetrics                                                                                                                                                                                                             | General surgery                                                                                                                                                                                                                                                                                                                                                                         | Urology                                                                                                                                                                                                                                                                                         | Neurosurgery                                                                                                                                                                      |
|---------------------------------------------------------------------------------------------------------------------------------------------------------------------------------------------------------------------------------------------------------------------------------------------------------------------------------------------------------------------------------------------------------------------------------------------------------|-------------------------------------------------------------------------------------------------------------------------------------------------------------------------------------------------------------------------------------------------------------------------------------------------------------------------|-----------------------------------------------------------------------------------------------------------------------------------------------------------------------------------|------------------------------------------------------------------------------------------------------------------------------------------------------------------------------------------------------------------------------------|-----------------------------------------------------------------------------------------------------------------------------------------------------------------------------------------------------------------------------------------------------------------------------------------------------------------------------------------------------------------------------------------|-------------------------------------------------------------------------------------------------------------------------------------------------------------------------------------------------------------------------------------------------------------------------------------------------|-----------------------------------------------------------------------------------------------------------------------------------------------------------------------------------|
| <ul style="list-style-type: none"> <li>• Coronary artery bypass grafting-on pump</li> <li>• Coronary artery bypass grafting-off pump</li> <li>• Valve surgery</li> <li>• Surgery of the great vessels</li> <li>• Head neck vascular</li> <li>• Abdominal vascular</li> <li>• Iliofemoral vascular</li> <li>• Renal vascular</li> <li>• Thoracic vascular</li> <li>• Endovascular procedures</li> <li>• Congenital heart</li> <li>• Lobectomy</li> </ul> | <ul style="list-style-type: none"> <li>• Hip arthroplasty</li> <li>• Knee arthroplasty</li> <li>• Vertebra surgery</li> <li>• Scoliosis surgery</li> <li>• Fracture repair</li> <li>• Surgery for bone tumours upper extremity</li> <li>• Surgery for bone tumours lower extremity</li> <li>• Hemipelvectomy</li> </ul> | <ul style="list-style-type: none"> <li>• Kidney recipient</li> <li>• Liver recipient</li> <li>• Heart recipient</li> <li>• Lung recipient</li> <li>• Free flap surgery</li> </ul> | <ul style="list-style-type: none"> <li>• Total abdominal hysterectomy</li> <li>• Uterus adnexa surgery</li> <li>• Cervix surgery</li> <li>• Vagina perineal surgery</li> <li>• Oncological surgery</li> <li>• C-section</li> </ul> | <ul style="list-style-type: none"> <li>• Hepatectomy</li> <li>• Lobectomy</li> <li>• Gastrectomy</li> <li>• Colectomy</li> <li>• Pancreatectomy</li> <li>• Splenectomy</li> <li>• Esophagectomy</li> <li>• Adrenalectomy</li> <li>• Proctectomy</li> <li>• Small intestine surgery</li> <li>• Mastectomy</li> <li>• Abdominal mass surgery</li> <li>• Abdominal wall surgery</li> </ul> | <ul style="list-style-type: none"> <li>• Prostatectomy</li> <li>• Radical prostatectomy</li> <li>• Cystectomy partial</li> <li>• Radical cystectomy</li> <li>• Nephrectomy</li> <li>• Partial nephrectomy</li> <li>• Nephrolithotomy</li> <li>• Transurethral resections of prostate</li> </ul> | <ul style="list-style-type: none"> <li>• Intracranial mass surgery</li> <li>• Intracranial aneurysm surgery</li> <li>• Vertebra surgery</li> <li>• Spinal cord surgery</li> </ul> |

**Table S11** - Red blood cell transfusion indication

|                                                                                                                                                                                                                                                                                                                                                                                                                                                                                                                                                                                                                        |
|------------------------------------------------------------------------------------------------------------------------------------------------------------------------------------------------------------------------------------------------------------------------------------------------------------------------------------------------------------------------------------------------------------------------------------------------------------------------------------------------------------------------------------------------------------------------------------------------------------------------|
| <ul style="list-style-type: none"> <li>• Haemoglobin trigger</li> <li>• Hypotension</li> <li>• Tachycardia</li> <li>• Arrhythmia</li> <li>• Electrocardiography changes</li> <li>• High lactate level</li> <li>• Acidosis</li> <li>• Presence of comorbidity</li> <li>• According to monitoring of advanced haemodynamic parameter (define parameter; value)</li> <li>• Increased surgical blood loss</li> <li>• Oozing</li> <li>• Point-of-care coagulation testing</li> <li>• Coagulopathy</li> <li>• Drugs affecting coagulation</li> <li>• Abnormal coagulation profile</li> <li>• Other (define other)</li> </ul> |
|------------------------------------------------------------------------------------------------------------------------------------------------------------------------------------------------------------------------------------------------------------------------------------------------------------------------------------------------------------------------------------------------------------------------------------------------------------------------------------------------------------------------------------------------------------------------------------------------------------------------|
